# Supplementary material for: Adrenergic modulation of melanocortin pathway by hunger signals
Source: PubMed Central journal article supplement (PMC10587058; doi:10.1038/s41467-023-42362-8), 2023-10-19
Supplement: 41467_2023_42362_MOESM1_ESM.pdf [file 41467_2023_42362_MOESM1_ESM.pdf]

**PVN:GRAB<sub>NE2h</sub> Fasted + Inaccessible food**

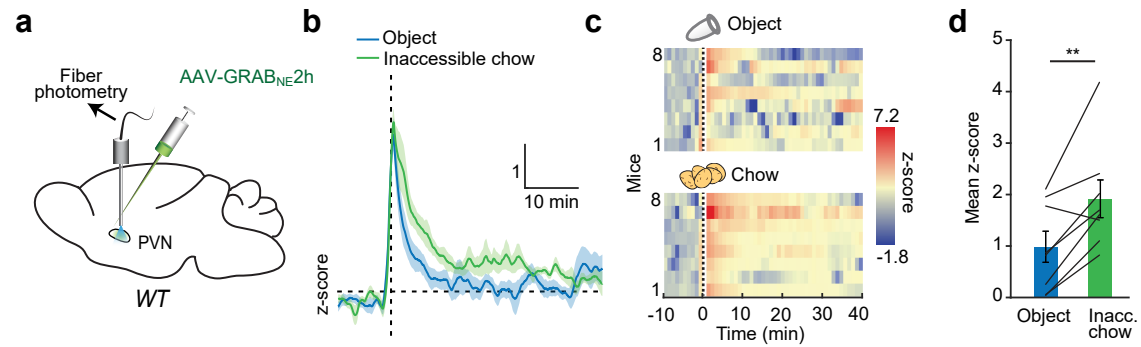

**PVN:GRAB<sub>NE2h</sub> Ad lib**

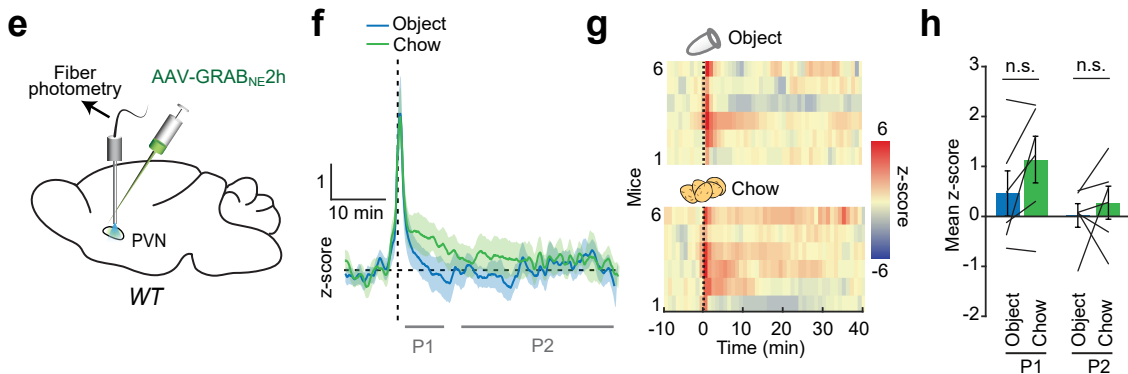

**TH:AxonGCaMP  
NTS → PVN Ad lib**

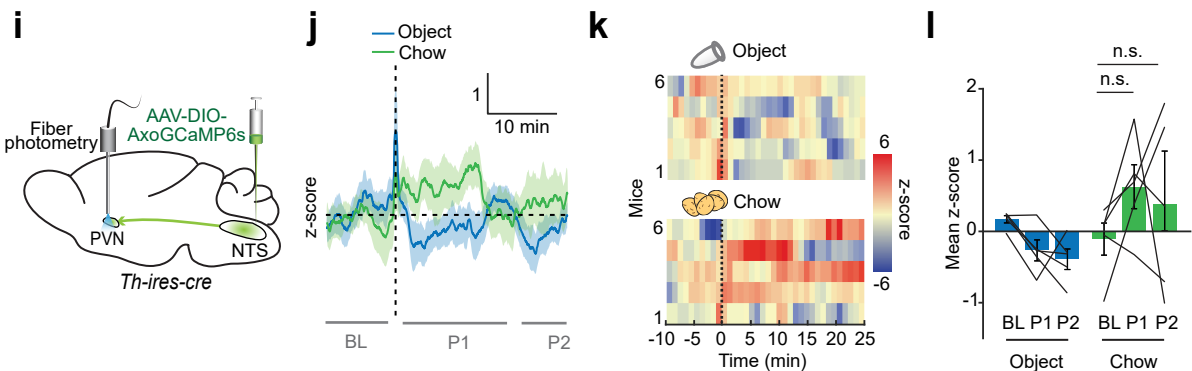

**Supplementary Figure 1. The initial food-induced activation phase in PVN NE/E levels is sensory mediated and the food responsiveness is abolished in free feeding mice.**

**a** Schematic of viral injection and fiber photometry-based NE/E measurement from PVN. **b,c** Average fiber photometry trace (**b**) and individual heat maps (**c**) showing GRAB<sub>NE2h</sub> signal in response to inaccessible chow food or inedible object. **d** Quantification of mean GRAB<sub>NE2h</sub> fluorescence in (**b**), n=8 mice, two-tailed, paired t-test, \*\*p=0.0063. **e** Schematic of GRAB<sub>NE2h</sub> measurement from PVN. **f,g** Average line graph (**f**) and heat map of individual mouse (**g**) depicting change in GRAB<sub>NE2h</sub> signal over time in response to chow food or inedible object presentation. **h** Average bar graph of change in GRAB<sub>NE2h</sub> signal compared in response to object and chow presentation (n=6 mice, two-tailed paired t-tests, n.s.: p>0.08). **i-l** Same as in (**e-h**) except that NTS<sup>TH</sup>→PVN projection activity is measured using axon-GCaMP expression in NTS<sup>TH</sup> neurons, (n=5 mice, two-way RM-ANOVA with Tukey's multiple corrections, n.s.: p>0.58. Data are presented as mean values +/- SEM.

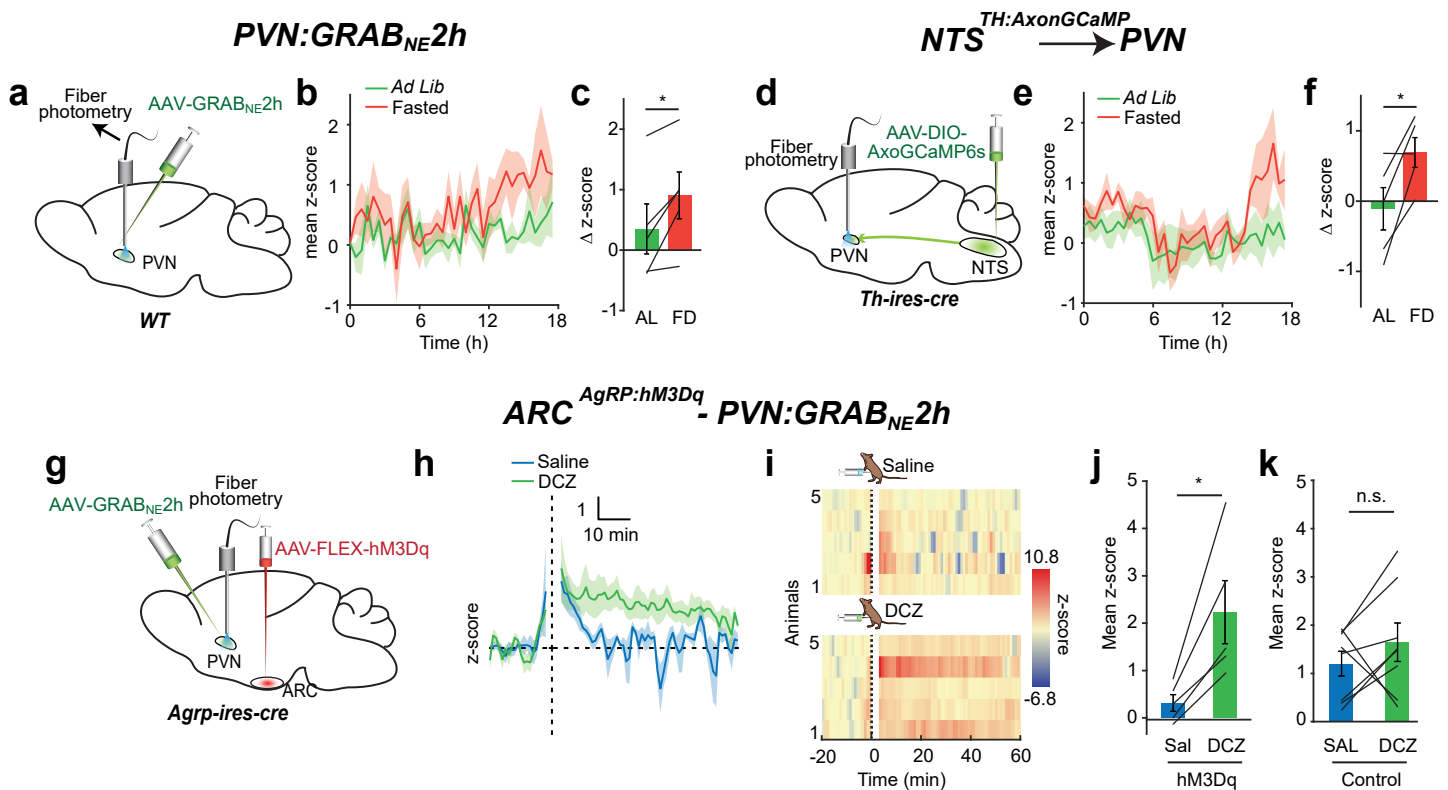

**Supplementary Figure 2. Prolonged fasting elevates nor/adrenergic input to PVN.**

**a** Schematic of GRAB<sub>NE</sub>2h measurement from PVN. **b,c** Average line graph of chronic changes in NE/E signal in the presence and absence of food (n=5 mice, \*p=0.034, two-tailed paired t-test). **d-f** Same as in a-c except that NTS<sup>TH</sup>→PVN projection activity is measured using axon-GCaMP expression in NTS<sup>TH</sup> neurons (n=5 mice, \*p=0.027, two-tailed paired t-test). **g** Schematic of viral injections and fiber photometry-based NE/E measurement from PVN during chemogenetic AgRP stimulation. **h,i** Average fiber photometry trace (**h**) and individual heat maps (**i**) showing GRAB<sub>NE</sub>2h response with and without concurrent AgRP neuron stimulation. **j,k** Quantification of GRAB<sub>NE</sub>2h fluorescence in AgRP:hM3D expressing (**j**) and control (**k**, no DREADD) mice after saline or DCZ ip injection. (n=5 mice/group, \*p=0.019 (AgRP:hM3D) and n.s.: p=0.37 (control), two-tailed paired t-test). Data are presented as mean values +/- SEM.

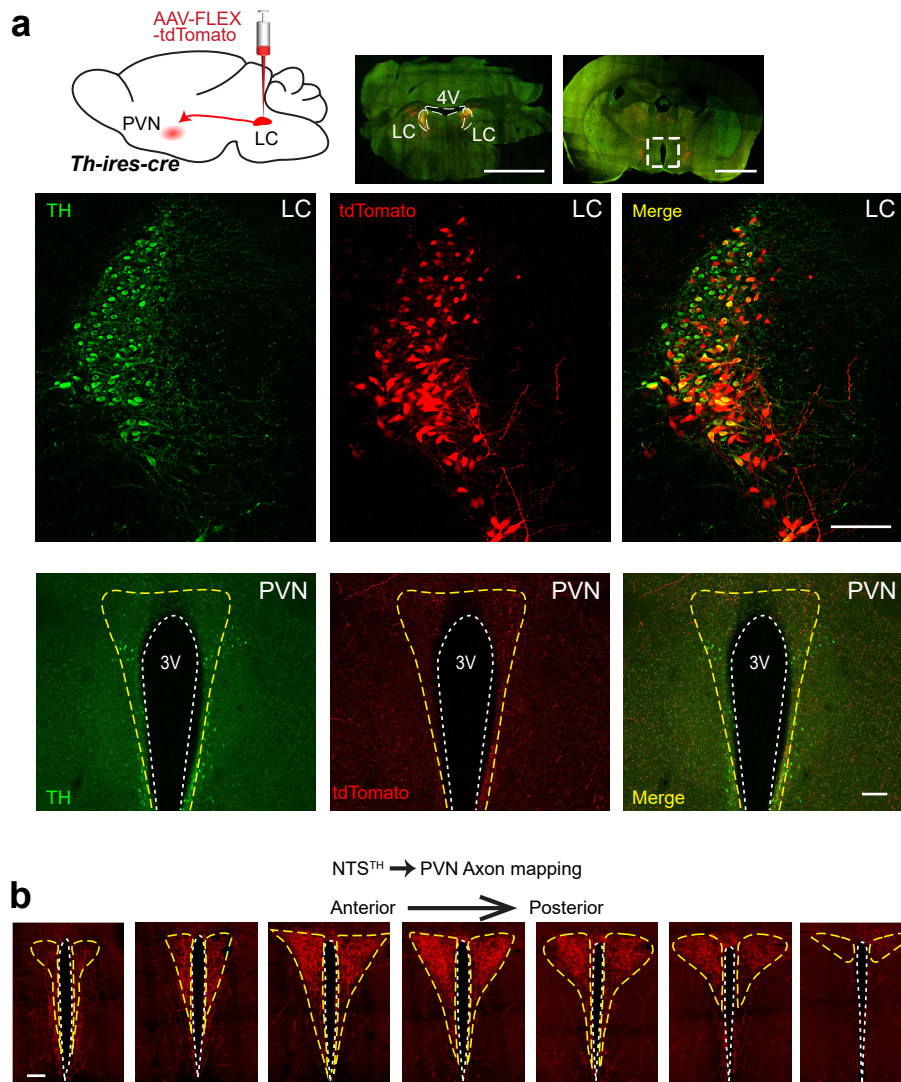

**Supplementary Figure 3. PVN projection profiles of catecholaminergic hindbrain neurons.**

**a** Schematic for assessing LC<sup>TH</sup> projections using anterograde labeling with cre-dependent tdTomato. Representative images showing tdTomato (red) expression in tyrosine hydroxylase (green) positive LC neurons. Representative photomicrographs showing sparse PVN innervation by LC<sup>TH</sup> neurons (scale bars: 2 mm, 100  $\mu$ m and 200  $\mu$ m). **b** Image showing robust NTS<sup>TH</sup> projections (red) distributed throughout the rosto-caudal PVN (scale bar: 200  $\mu$ m).

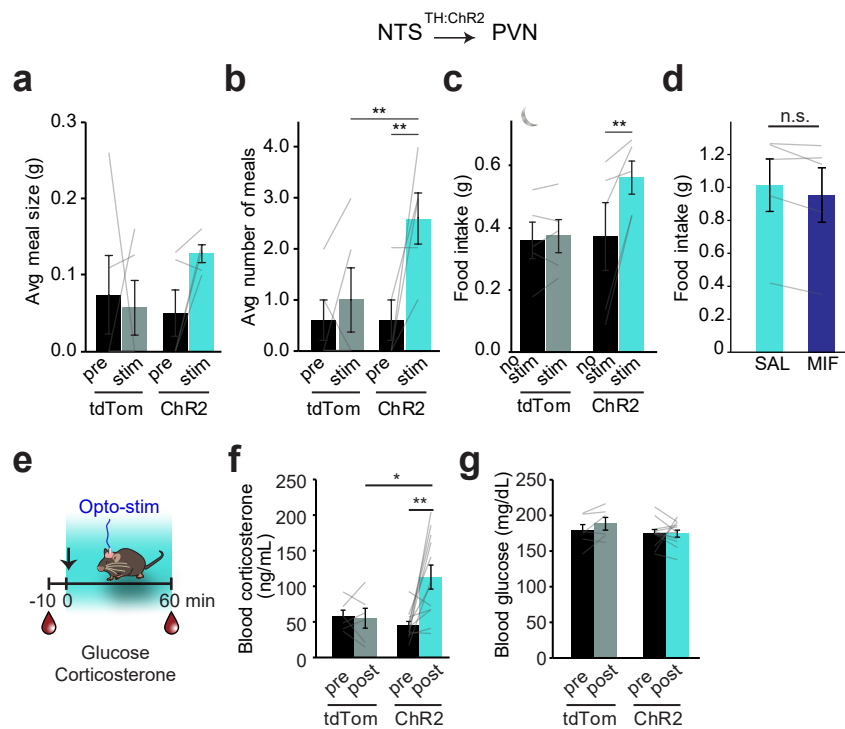

**Supplementary Figure 4. NTS<sup>TH</sup>→PVN activation evokes feeding and corticosterone release.**

**a,b** Effect of NTS<sup>TH</sup>→PVN optogenetic activation during light cycle on meal size (a) and number of meals (b) in control tdTomato (n=5) and Chr2 (n=5) expressing mice (2-way RM-ANOVA with Sidak's multiple comparison, tdTom stim vs Chr2 stim \*\*p=0.0055, Chr2 stim vs Chr2 no stim \*\*p=0.0024). **c** Effect of NTS<sup>TH</sup>→PVN activation on food intake at dark onset in control tdTomato (n=5 mice) and Chr2 (n=5 mice) animals (2-way RM ANOVA with Sidak's multiple comparison, \*\*p=0.0071). **d** Effect of Mifepristone (5mg/kg) during NTS<sup>TH</sup>→PVN photostimulation on feeding response (two-tailed paired t-test, n.s.: p=0.069) **e** Experimental schematic for assessing effects of NTS<sup>TH</sup>→PVN photoactivation on circulating corticosterone and glucose levels. **f,g** Effect of 1h NTS<sup>TH</sup>→PVN stimulation on systemic (f) corticosterone and (g) glucose levels in control tdTomato (n=6) and Chr2 (n=12) transduced mice (2-way RM ANOVA with Sidak's multiple comparison, \*p=0.0126, \*\*p=0.0013). Data are presented as mean values +/- SEM.



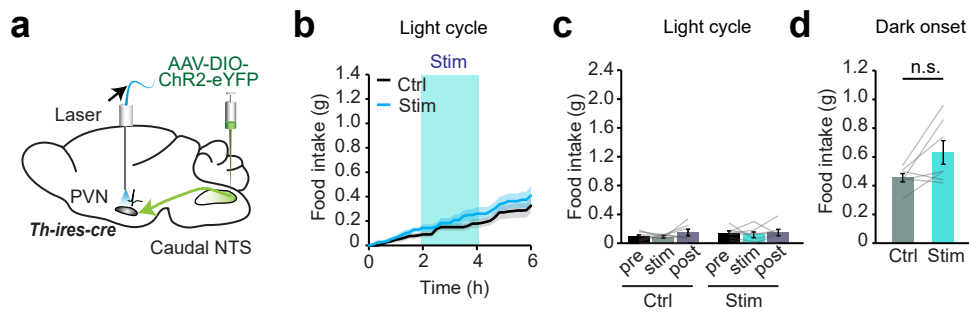

**Supplementary Figure 5. Photostimulating caudal NTS<sup>TH</sup> → PVN projection does not affect food intake.**

**a** Schematic depiction for activation of caudal NTS<sup>TH</sup> → PVN projection. **b,c** Cumulative food intake (b, n=7, two-tailed paired t-test) and average total food intake before, during and after photostimulation of cNTS<sup>TH</sup> → PVN projection (2 hours each) in free feeding mice in light phase (n=7, two-way RM-ANOVA). **d** Summary bar graph of 2-hours dark onset food intake with and without concurrent caudal cNTS<sup>TH</sup> → PVN projection stimulation (n=7 mice, two-tailed paired t-test, n.s.: p=0.057). Data are presented as mean values +/- SEM.

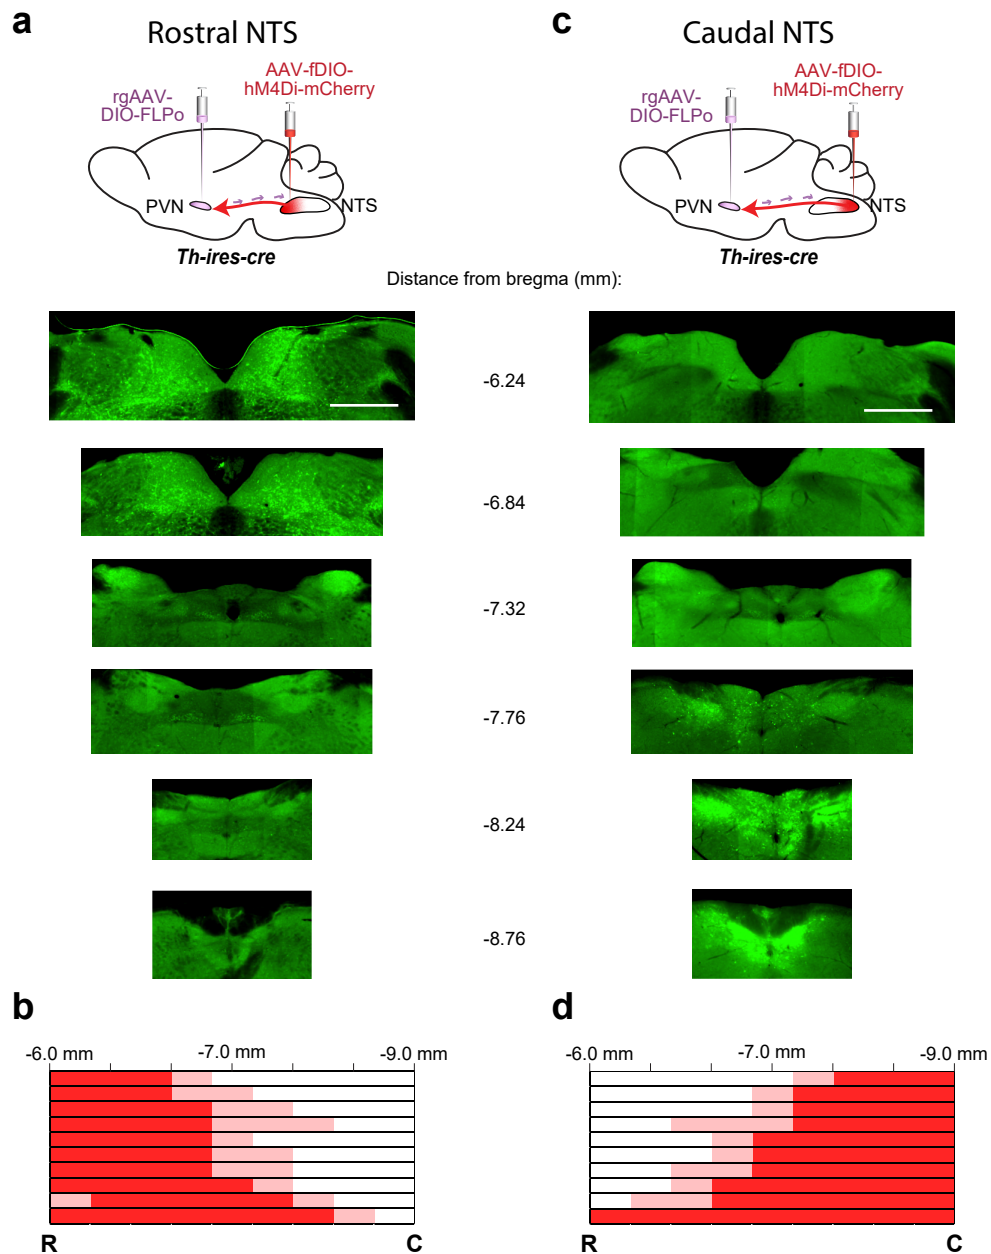

**Supplementary Figure 6. Distribution of hM4Di expression in rostral and caudal NTS<sup>TH</sup> neurons.**

**a** Schematic and representative images of hM4Di targeted to rostral NTS<sup>TH</sup> neurons. **b** Distribution of rostral NTS targeted hM4Di expression throughout the rostral-caudal axis of the NTS (mCherry signal was amplified with immunolabeling using a 488 secondary Ab). **c** Schematic for hM4Di injections into the caudal NTS (scale bars: 500  $\mu$ m). **d** Distribution profile of hM4Di targeted to caudal NTS. Relative expression is indicated by color: dark red – high expression, light red – low expression, white – no expression.

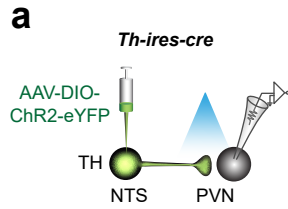

**EXCITATORY CONNECTION**

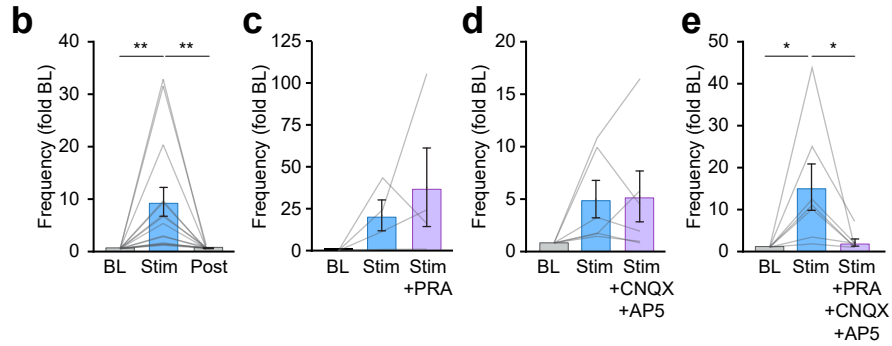

**INHIBITORY CONNECTION**

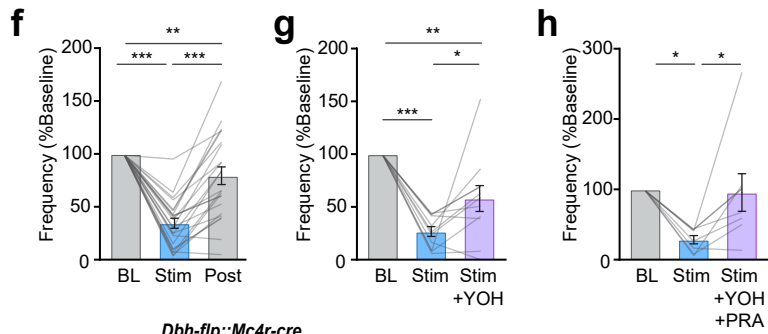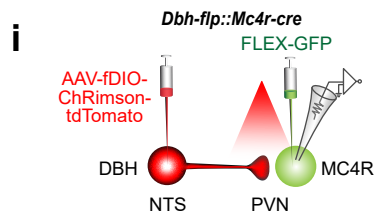

**EXCITATORY CONNECTION**

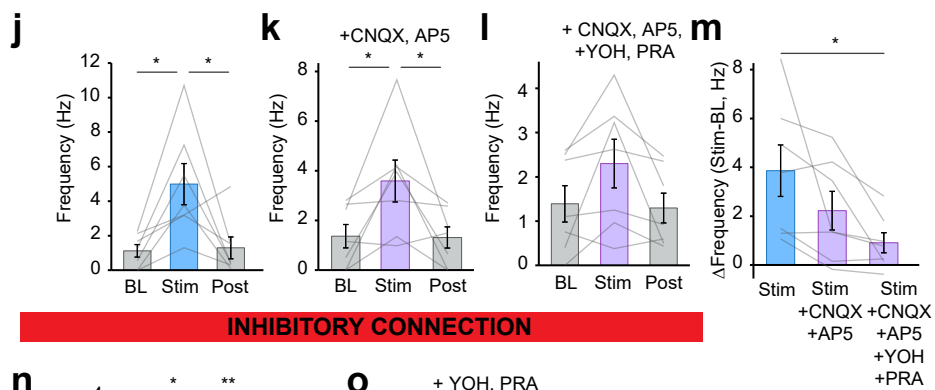

**INHIBITORY CONNECTION**

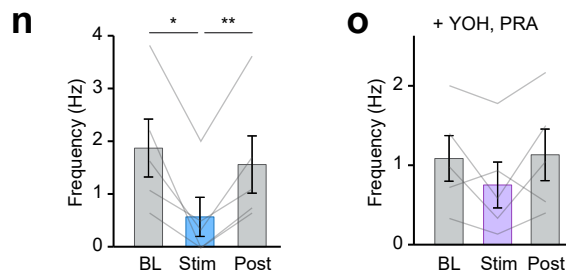

**Supplementary Figure 7. NTS<sup>TH</sup>→PVN connection rely on nor/adrenergic signaling.**

**a** Schematic for evaluating functional NTS<sup>TH</sup>→PVN connectivity using ChR2-assisted stimulation combined with loose seal recordings. **b-e** NTS<sup>TH</sup> axon stimulation excited a subset of PVN neurons (Two-way RM-ANOVA with Tukey's multiple comparisons). Effect of NTS<sup>TH</sup> photostimulation on PVN firing in control conditions (**b**, n=14 neurons, \*\*p<0.0023), in the presence of prazosin (**c**, n=4 neurons), CNQX and AP5 (**d**, n=6 neurons), and prazosin, CNQX, and AP5 (**e**, n=7 neurons, \*p<0.031). **f-h** Subset of PVN neurons inhibited by NTS<sup>TH</sup> projections (Two-way RM-ANOVA with Tukey's multiple comparisons). Effects of NTS<sup>TH</sup>→PVN inhibition in control conditions (**f**, n=22 neurons, \*\*p=0.0087, \*\*\*p<0.0001), with bath application of yohimbine (**g**, n=11 neurons, \*p=0.025, \*\*p=0.0021, \*\*\*p<0.0001) and yohimbine and prazosin (**h**, n=8 neurons, \*p<0.0192). **i** Schematic for evaluating functional NTS<sup>TH</sup>→PVN<sup>MC4R</sup> connectivity using chrimson-assisted stimulation combined with loose seal recordings. **j-l** Subset of PVN<sup>MC4R</sup> neurons activated by NTS<sup>DBH</sup> axonal photostimulation (two-tailed paired t-tests). Response profile under control (**j**, n=7 neurons, \*p<0.039), glutamatergic blockers CNQX and AP5 (**k**, n=7 neurons \*p<0.040), and combination of glutamatergic and adrenergic blockers (**l**). **m** Summary of firing rate change as blockers added progressively (n=7 neurons, \*p=0.027). **n,o** PVN<sup>MC4R</sup> neurons inhibited by NTS<sup>DBH</sup> axonal photostimulation (two-tailed paired t-tests). Response profile under conditions of control (**n**, n=5 neurons, \*p=0.015, \*\*p=0.0084) and  $\alpha$ -adrenergic blockers yohimbine and prazosin (**o**, n=5 neurons, n=2-4 mice/group). Data are presented as mean values +/- SEM. For specific p-values, data and statistics, please see associated Source Data file.

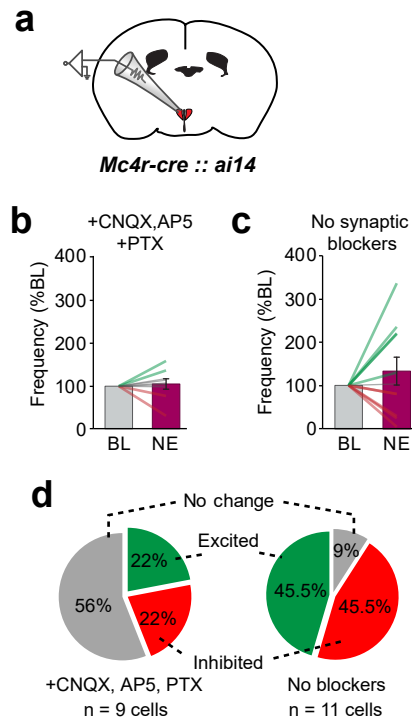

**Supplementary Figure 8. Norepinephrine can directly and indirectly modulate PVN<sup>MC4R</sup> neuron activity.**

**a** Schematic for loose seal patch clamp from tdTomato labelled PVN<sup>MC4R</sup> neurons. **b,c** Effect of NE on PVN<sup>MC4R</sup> firing with (**b**, n=9 neurons, 3 mice) and without (**c**, n=10 neurons, 4 mice) synaptic blockade. **d** Pie chart summarizing effect of NE on PVN<sup>MC4R</sup> neuron activity with and without synaptic blockade. Data are presented as mean values +/- SEM.

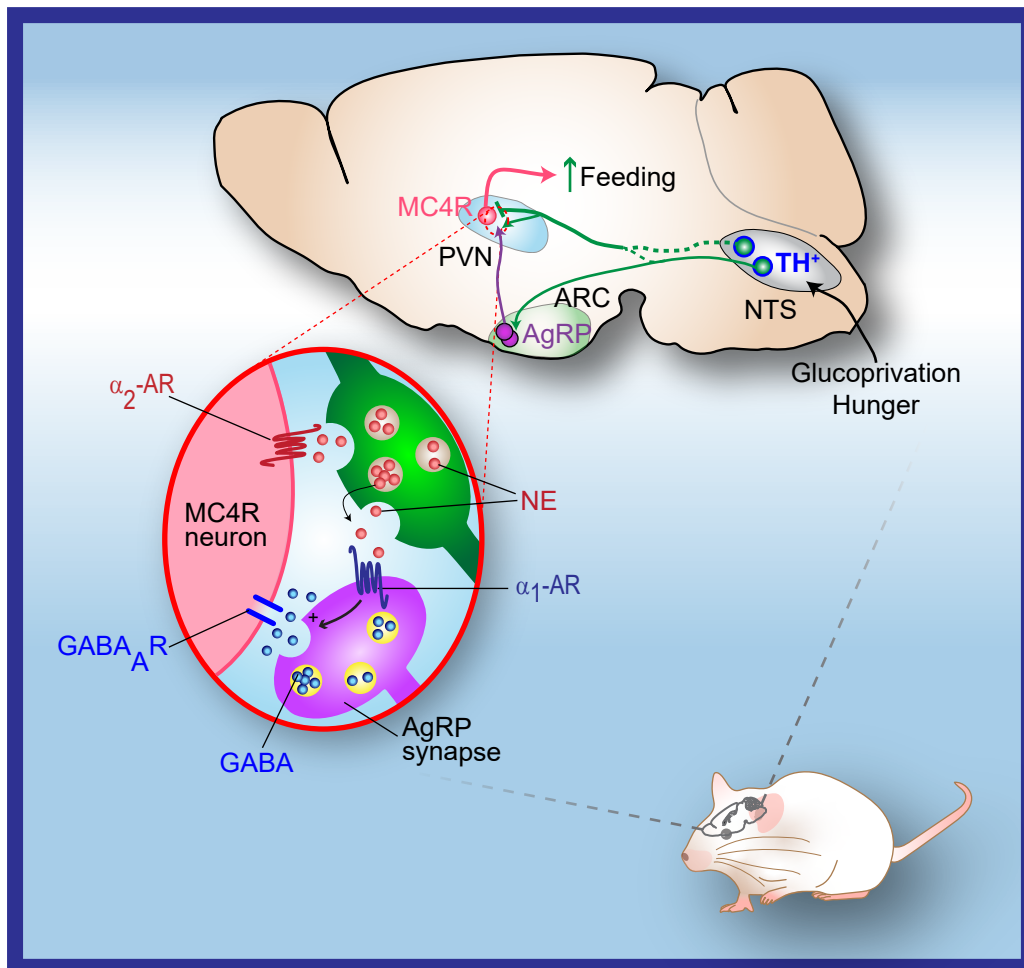

Supplementary Figure 9. A schematic model describing possible mechanism for nor/adrenergic modulation of melanocortin pathway.
